# Supplementary material for: Stronger Together. Poly(Styrene) Gels Reinforced by Soft Gellan Gum
Source: MDPI journal article supplement (doi:10.3390/gels8100607), 2022-09-22
Supplement: s1 [file s1]

# Stronger Together. Poly(styrene) Gels Reinforced by Soft Gellan Gum

Dariya Getya<sup>1,2</sup> Ivan Gitsov<sup>1,2,3</sup>

<sup>1</sup>Department of Chemistry, State University of New York – ESF, Syracuse, NY 13210, USA

<sup>2</sup>The Michael M. Szwarc Polymer Research Institute, Syracuse, NY 13210, USA

<sup>3</sup>The BioInspired Institute, Syracuse University, Syracuse, NY 13244, USA

## Table of contents:

|                                                                                                                                                                                                                                             |        |
|---------------------------------------------------------------------------------------------------------------------------------------------------------------------------------------------------------------------------------------------|--------|
| <b>Figure S1.</b> Calibration curve constructed using UV-VIS absorbance of 4-VBC at 265 nm to estimate the Gellan Gum degree of substitution.                                                                                               | Page 2 |
| <b>Figure S2.</b> Size-exclusion chromatography dRI traces of PSt extracted by CHCl <sub>3</sub> after 48 h from PSt-VBzGG-m 1 wt% SIPNs. A – VBzGG-1, B – VBzGG-3, C – VBzGG-5, D – VBzGG-7, E – VBzGG-10. Tol – toluene flow rate marker. | Page 2 |
| <b>Figure S3.</b> FT-IR spectra of PSt-VBzGG-3 1 wt % SIPN (A) and PSt- <i>I</i> -VBzGG-3 1 wt% conetwork (B).                                                                                                                              | Page 3 |
| <b>Figure S4.</b> Size-exclusion chromatography dRI traces of PSt isolated after 48 h of CHCl <sub>3</sub> extraction of VBzGG-3 copolymerization mixtures. A - 1 wt%; B – 5 wt%, C – 10 wt%. Tol – toluene flow rate marker.               | Page 3 |
| <b>Figure S5.</b> TGA thermograms of Gellan Gum (GG), extracted poly(styrene), PSt and PSt-VBzGG-m SIPNs (PSt-GG-m).                                                                                                                        | Page 4 |
| <b>Figure S6.</b> DSC thermograms of PSt-VBzGG-5 1 wt% SIPN (A), PSt extracted from PSt-VBzGG-5 1 wt% SIPN (B) and PSt- <i>I</i> -VBzGG-5 1 wt% (C).                                                                                        | Page 4 |
| <b>Figure S7.</b> Storage modulus of PSt-VBzGG-m SIPNs (GG-1 – GG-10), PSt extracted from PSt-VBzGG-m SIPNs, and poly(styrene)/Gellan Gum physical mixture (PSt/GG).                                                                        | Page 5 |
| <b>Figure S8.</b> Loss modulus of PSt-VBzGG-m SIPNs (GG-1 – GG-10), PSt extracted from PSt-VBzGG-m SIPNs, and poly(styrene)/Gellan Gum physical mixture (PSt/GG).                                                                           | Page 5 |
| <b>Figure S9.</b> Tan $\delta$ curves of PSt-GG-m SIPNs, PSt extracted from PSt-VBzGG-m SIPNs (GG-1 – GG-10), and poly(styrene)/Gellan Gum physical mixture (PSt/GG).                                                                       | Page 6 |
| <b>Figure S10.</b> SEM of a PSt- <i>I</i> -VBzGG-5 10 wt % gel swollen in water. (a) sample at 200×magnification; (b) orange-framed area in image (a) observed at 850× magnification.                                                       | Page 6 |
| <b>Figure S11.</b> Chemical structures of Auramine O (AO) and Bromphenol Blue BPB                                                                                                                                                           | Page 6 |

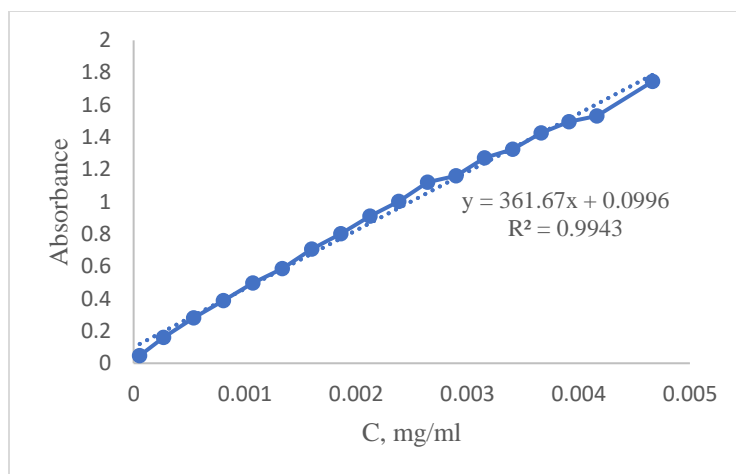

**Figure S1.** Calibration curve constructed using UV-VIS absorbance of 4-VBC at 265 nm to estimate the Gellan Gum degree of substitution.

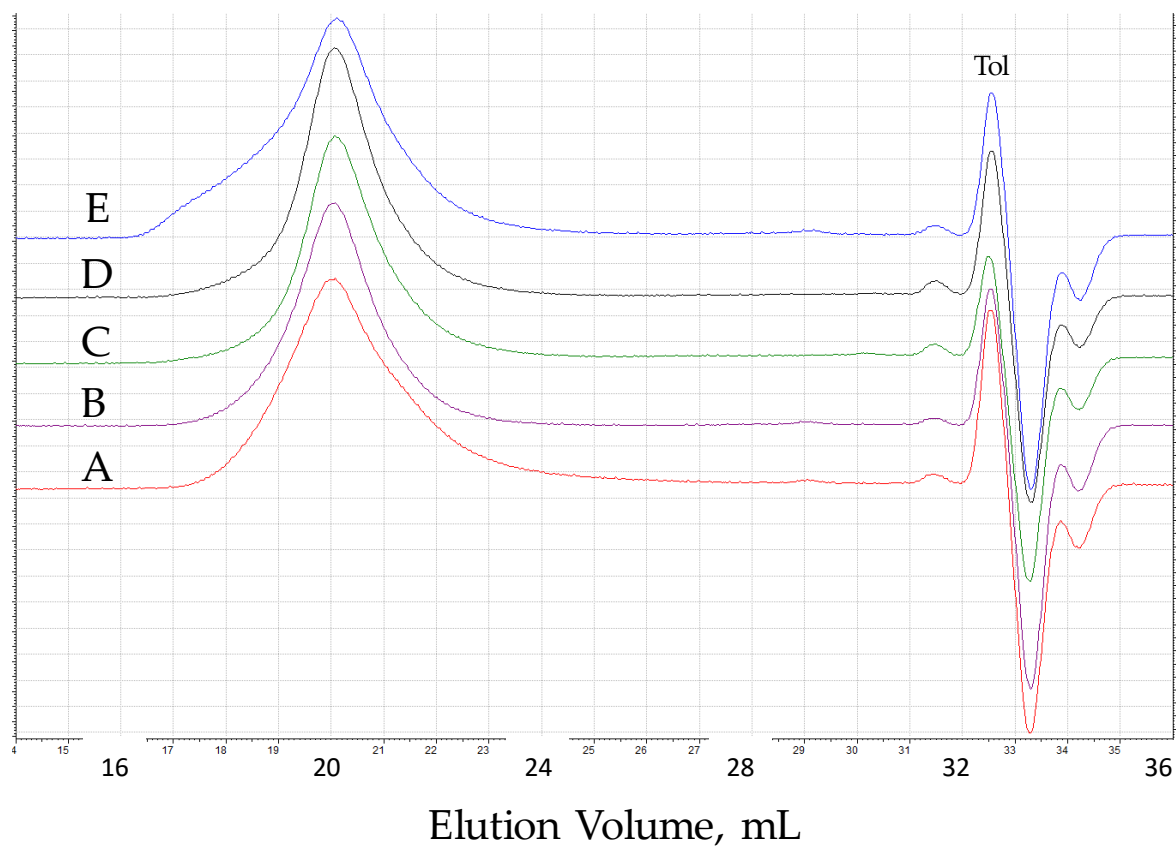

**Figure S2.** Size-exclusion chromatography dRI traces of PSt extracted by  $\text{CHCl}_3$  after 48 h from PSt-VBzGG-m 1 wt% SIPNs. A – VBzGG-1, B – VBzGG-3, C – VBzGG-5, D – VBzGG-7, E – VBzGG-10. Tol – toluene flow rate marker.

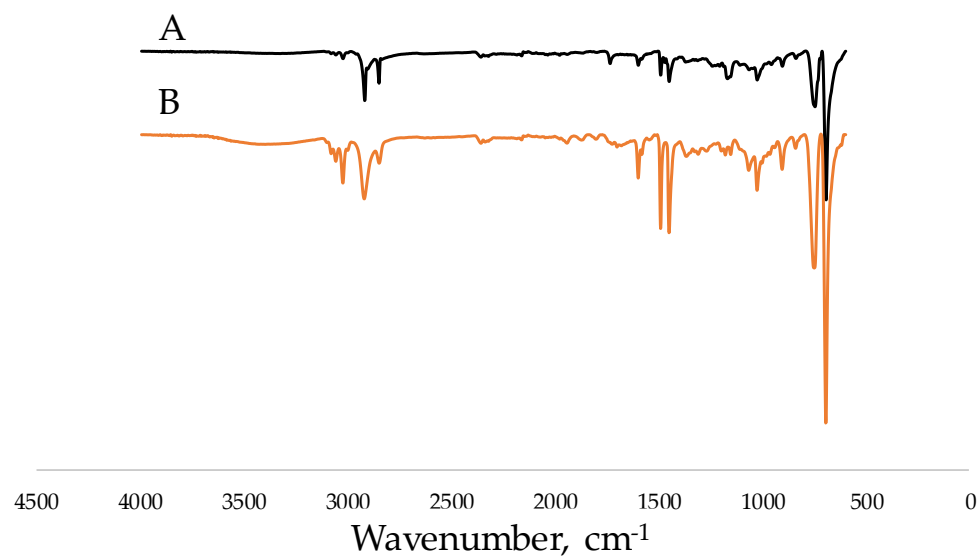

**Figure S3.** FT-IR spectra of PSt-VBzGG-3 1 wt % s-SIPN (A) and PSt-l-VBzGG-3 1 wt% conetwork (B).

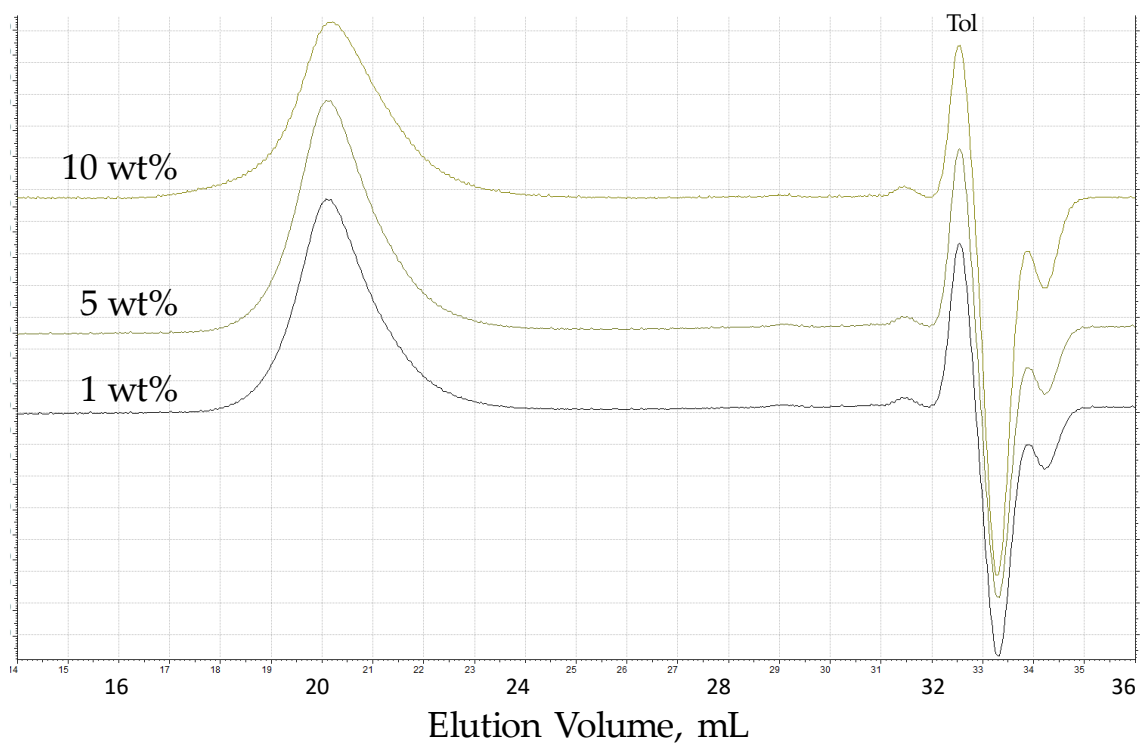

**Figure S4.** Size-exclusion chromatography dRI traces of PSt isolated after 48 h of CHCl<sub>3</sub> extraction of VBzGG-3 copolymerization mixtures. A - 1 wt%; B - 5 wt%, C - 10 wt%. Tol – toluene flow rate marker.

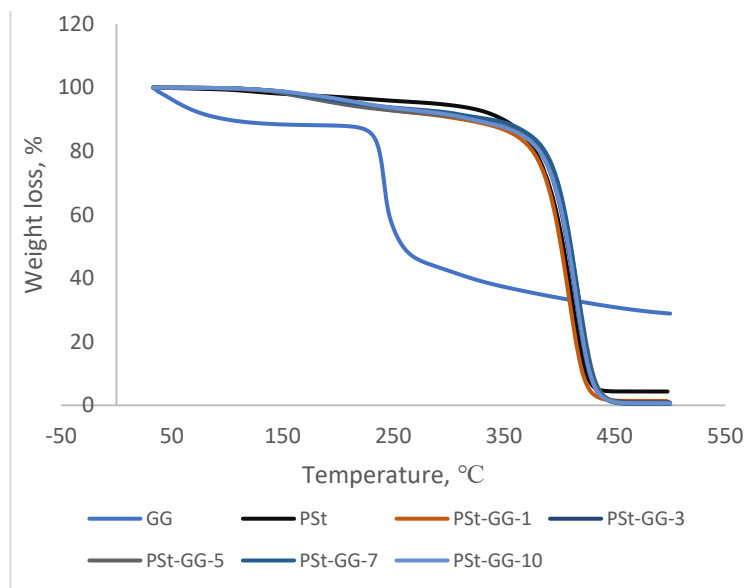

**Figure S5.** TGA thermograms of Gellan Gum (GG), extracted poly(styrene), PSt and PSt-VBzGG-m SIPNs (PSt-GG-m).

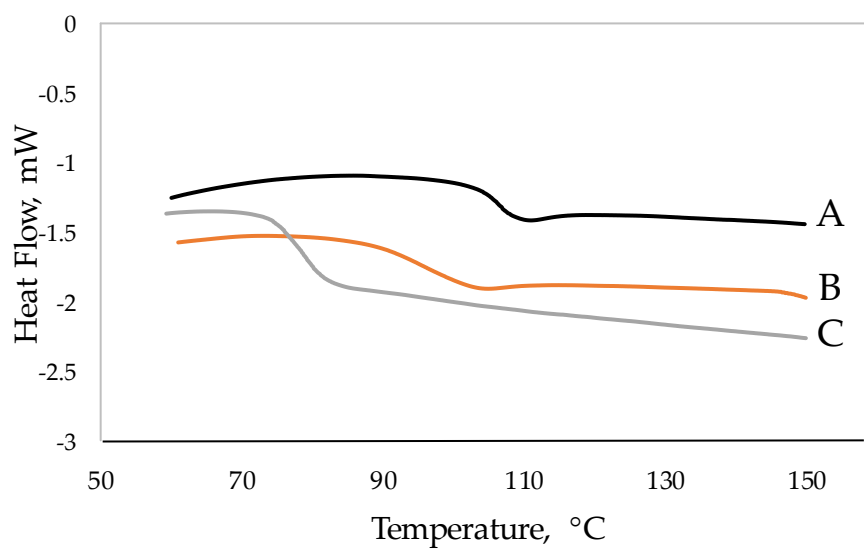

**Figure S6.** DSC thermograms of PSt-VBzGG-5 1 wt% SIPN (A), PSt extracted from PSt-VBzGG-5 1 wt% SIPN (B) and PSt-l-VBzGG-5 1 wt% (C).

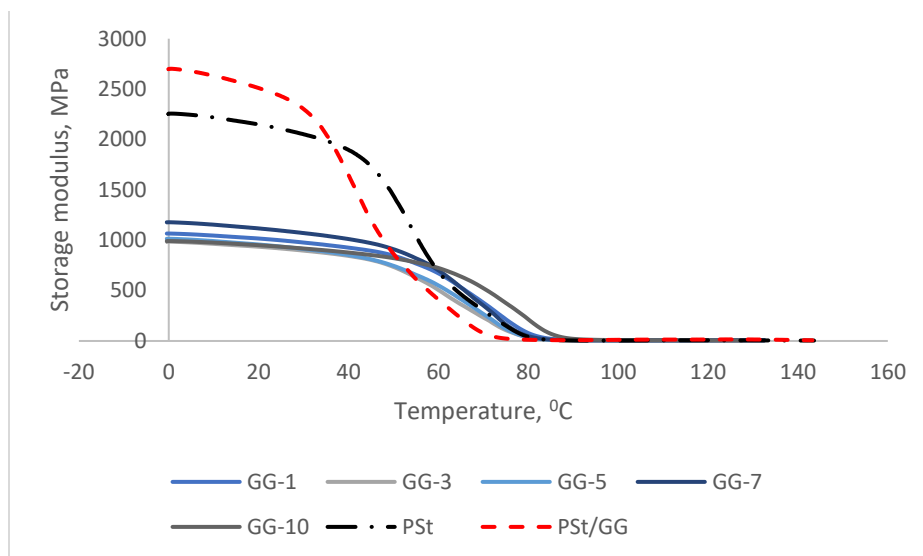

**Figure S7.** Storage modulus of PSt-VBzGG-m SIPNs (GG-1 – GG-10), PSt extracted from PSt-VBzGG-m SIPNs, and poly(styrene)/Gellan Gum physical mixture (PSt/GG).

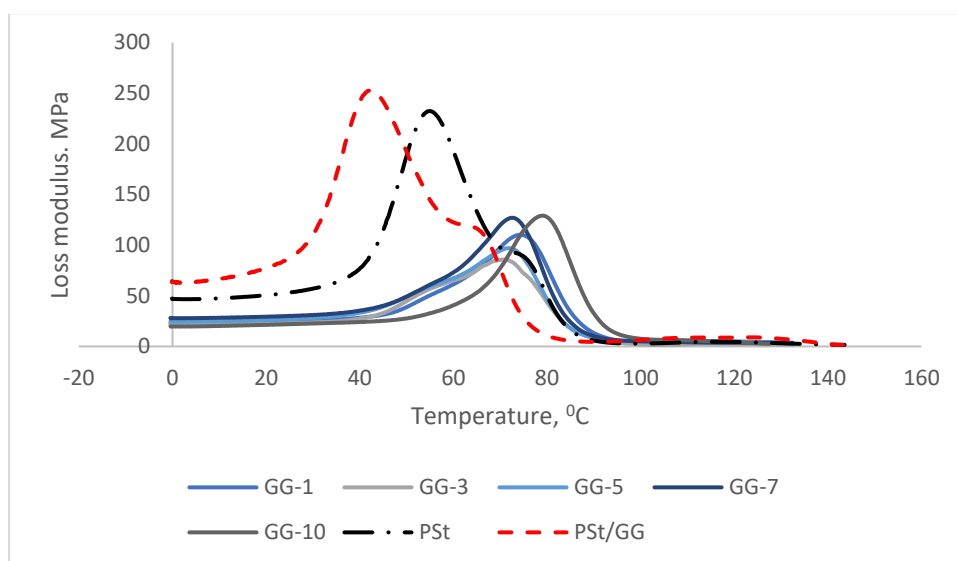

**Figure S8.** Loss modulus of PSt-VBzGG-m SIPNs (GG-1 – GG-10), PSt extracted from PSt-VBzGG-m SIPNs, and poly(styrene)/Gellan Gum physical mixture (PSt/GG).

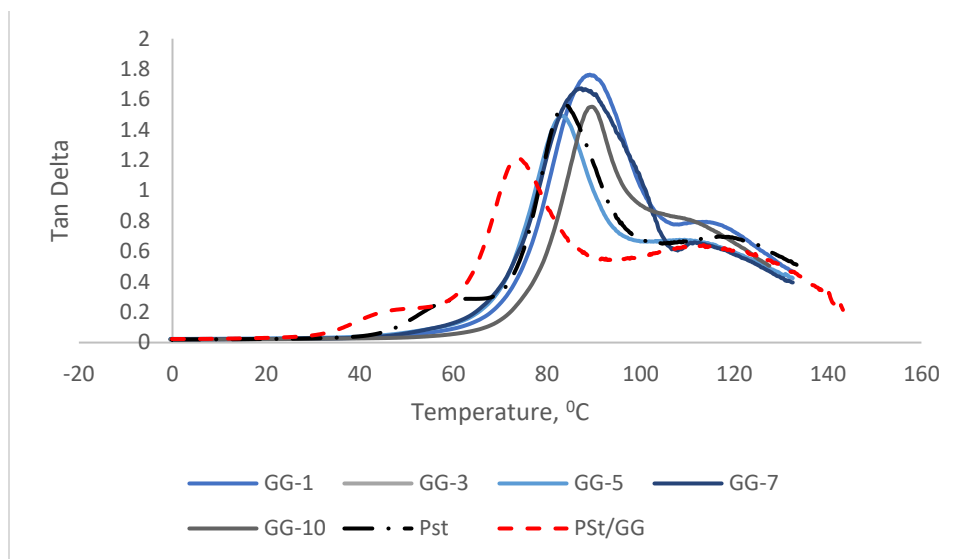

**Figure S9.** Tan  $\delta$  curves of PSt-GG-m SIPNs, PSt extracted from PSt-VBzGG-m SIPNs (GG-1 – GG-10), and poly(styrene)/Gellan Gum physical mixture (PSt/GG).

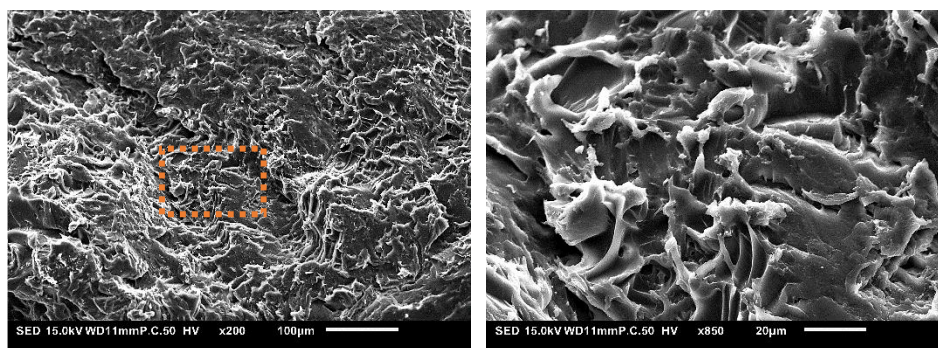

(a)

(b)

**Figure S10.** SEM of a PSt-*l*-VBzGG-5 10 wt % gel swollen in water. (a) sample at 200 $\times$  magnification; (b) orange-framed area in image (a) observed at 850 $\times$  magnification.

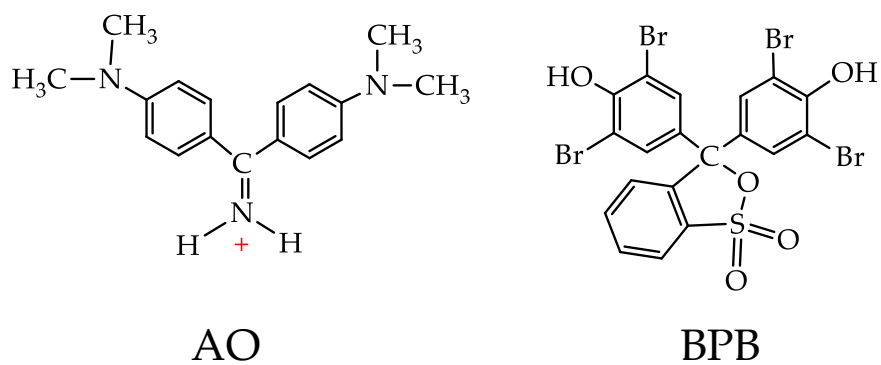

**Figure S11.** Chemical structures of Auramine O (AO) and bromphenol blue (BPB).
